# Supplementary material for: Multi-Gene Panel Testing for Hereditary Cancer Predisposition Among Patients Sixty-Five Years and Above Diagnosed With Breast Cancer
Source: PubMed Central journal article supplement — World J Oncol. 2024 Sep 16;15(5):777–83. doi: 10.14740/wjon1919 (PMC11424113; doi:10.14740/wjon1919), 2024-09-16
Supplement: wjon-15-777-s002.pdf [file wjon-15-777-s002.pdf]

**Suppl 2.** List of All Detected Pathogenic/Likely Pathogenic Variants

| <b>Gene</b>  | <b>Exon/intron</b> | <b>Nucleotide change</b> | <b>Amino acid change</b> | <b>Variant type</b> | <b>Frequency*</b> |
|--------------|--------------------|--------------------------|--------------------------|---------------------|-------------------|
| <i>APC</i>   | Exon 16            | c.3920T>A                | p.Ile1307Lys             | Missense            | 3                 |
| <i>ATM</i>   | Exon 15            | c.2284_2285del           | p.Leu762Valfs*2          | Deletion            | 1                 |
| <i>ATM</i>   | Exon 29            | c.4358_4359del           | p.Ile1453Lysfs*37        | Deletion            | 1                 |
| <i>ATM</i>   | Exon 38            | c.5755C>T                | p.Gln1919*               | Nonsense            | 1                 |
| <i>ATM</i>   | Exon 52            | c.7788G>A                | Silent                   | Splice Site Variant | 1                 |
| <i>ATM</i>   | Exon 55            | c.8122G>A                | p.Asp2708Asn             | Missense            | 1                 |
| <i>BRCA1</i> | Exon 2             | c.66dup                  | p.Glu23Argfs*18          | Duplication         | 1                 |
| <i>BRCA1</i> | Exon 18            | c.5161C>T                | p.Gln1721*               | Nonsense            | 1                 |
| <i>BRCA1</i> | Exon 23            | c.5431C>T                | p.Gln1811Ter             | Missense            | 1                 |
| <i>BRCA1</i> | Intron 9           | c.671-1G>T               | Splice acceptor          | Splice Site Variant | 1                 |
| <i>BRCA2</i> | Exons 5-11         | Duplication              | Duplication              | Duplication         | 1                 |
| <i>BRCA2</i> | Exon 11            | c.2254_2257del           | p.Asp752Phefs*19         | Deletion            | 2                 |
| <i>BRCA2</i> | Exon 11            | c.5351dup                | p.Asn1784Lysfs*3         | Duplication         | 1                 |
| <i>BRCA2</i> | Exon 22            | c.8760T>G                | p.Tyr2920*               | Nonsense            | 1                 |
| <i>BRIP1</i> | Intron 17          | c.2493-2A>G              | Splice acceptor          | Splice Site Variant | 1                 |
| <i>CHEK2</i> | Exon 4             | c.499G>A                 | p.Gly167Arg              | Missense            | 3                 |
| <i>CHEK2</i> | Exon 4             | c.470T>C                 | p.Ile157Thr              | Missense            | 1                 |
| <i>CHEK2</i> | Intron 2           | c.320-1G>T               | Splice acceptor          | Splice Site Variant | 1                 |
| <i>CHEK2</i> | Intron 4           | c.592+3A>T               | Intronic                 | Splice Site Variant | 1                 |
| <i>PALB2</i> | Exon 4             | c.682C>T                 | p.Gln228*                | Nonsense            | 1                 |
| <i>RAD50</i> | Exon 1             | c.72del                  | p.Ile25Serfs*25          | Deletion            | 1                 |
| <i>SDHB</i>  | Exon 2             | c.143A>T                 | p.Asp48Val               | Missense            | 1                 |

\*Some patients had more than one variant.
